# Supplementary material
Source: MDPI journal article supplement (https://www.mdpi.com/2304-6740/8/4/27)
Supplement: s1 [file s1]

# Supplementary Materials: A Mixed-Valence Tetra-Nuclear Nickel Dithiolene Complex: Synthesis, Crystal Structure, and the Lability of Its Nickel Sulfur Bonds

Mohsen Ahmadi, Jevy Correia, Nicolas Chrysochos and Carola Schulzke \*

- 1)  $^1\text{H}$ -,  $^{13}\text{C}$ -NMR and Mass spectra of ligand precursor compounds **1** to **3** (Figures S1–S7).
- 2) IR spectrum of **3** (Figure S8).
- 3) Mass spectrum of **4** (Figure S9).
- 4) IR spectra of **4** (Figure S10).
- 5) UV-Vis spectra of **4** (Figure S11).
- 6) Voltammograms of **4** (Figures S12 and S13).
- 7) Magnetic properties/calculations (Figures S14 and S15).
- 8) Crystallography (Figure S16 and Tables S1–S5).

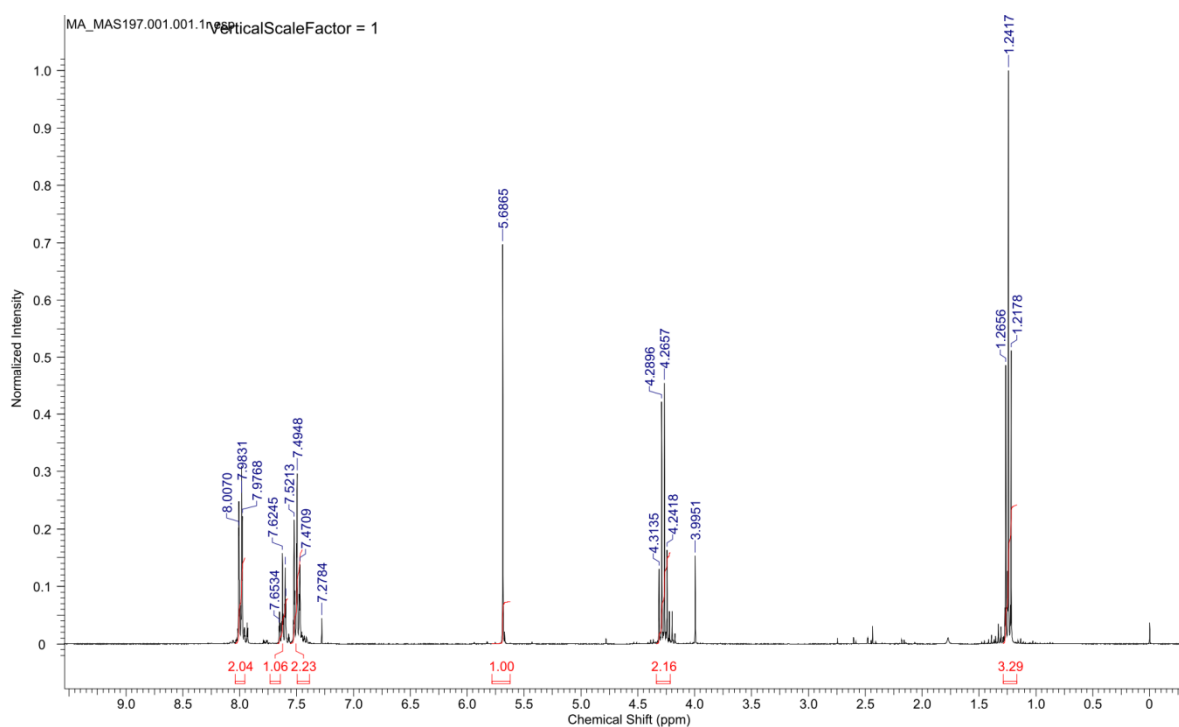

**Figure S1.**  $^1\text{H}$  NMR of ethyl 2-bromo-3-oxo-3-phenylpropanoate (**1**) in  $\text{CDCl}_3$  at 25 °C.

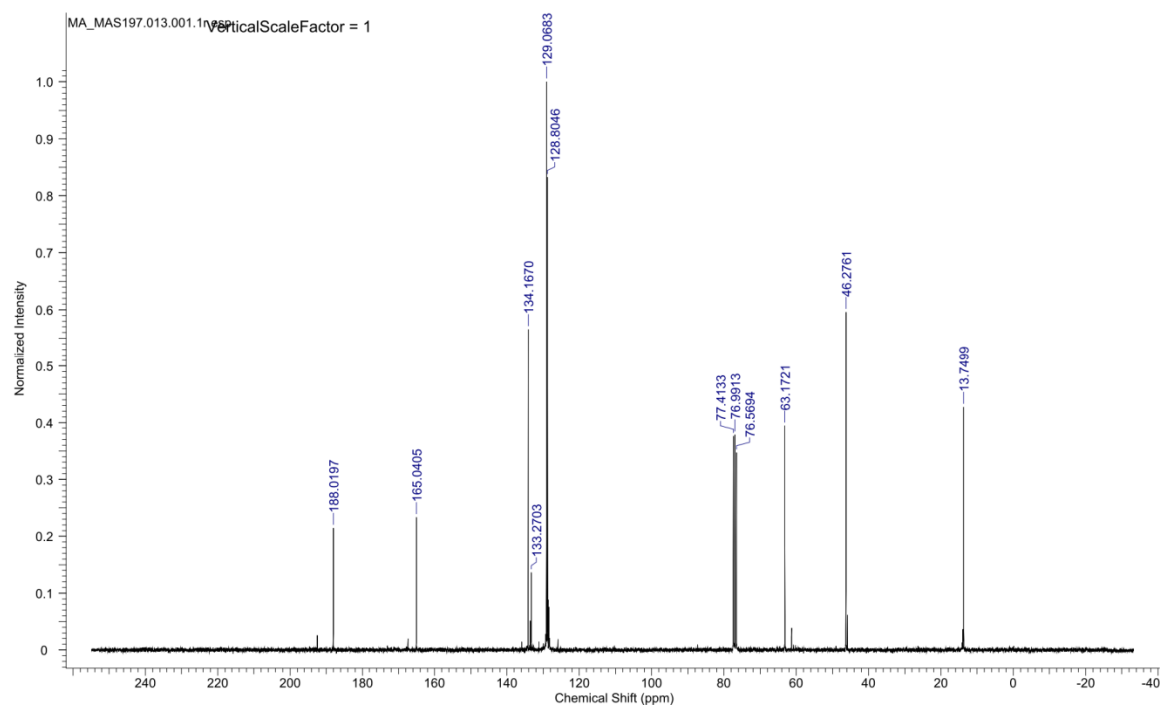

Figure S2.  $^{13}\text{C}$  NMR of **1** in  $\text{CDCl}_3$  at 25 °C.

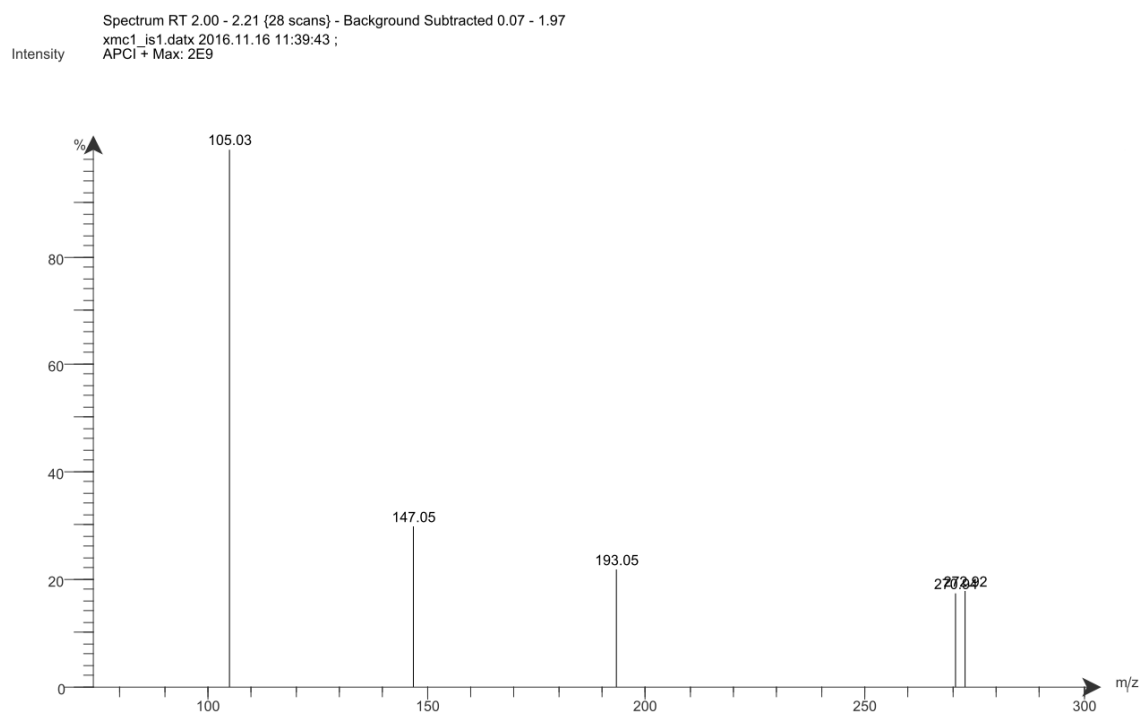

Figure S3. APCI mass spectrum of **1** in methanol.

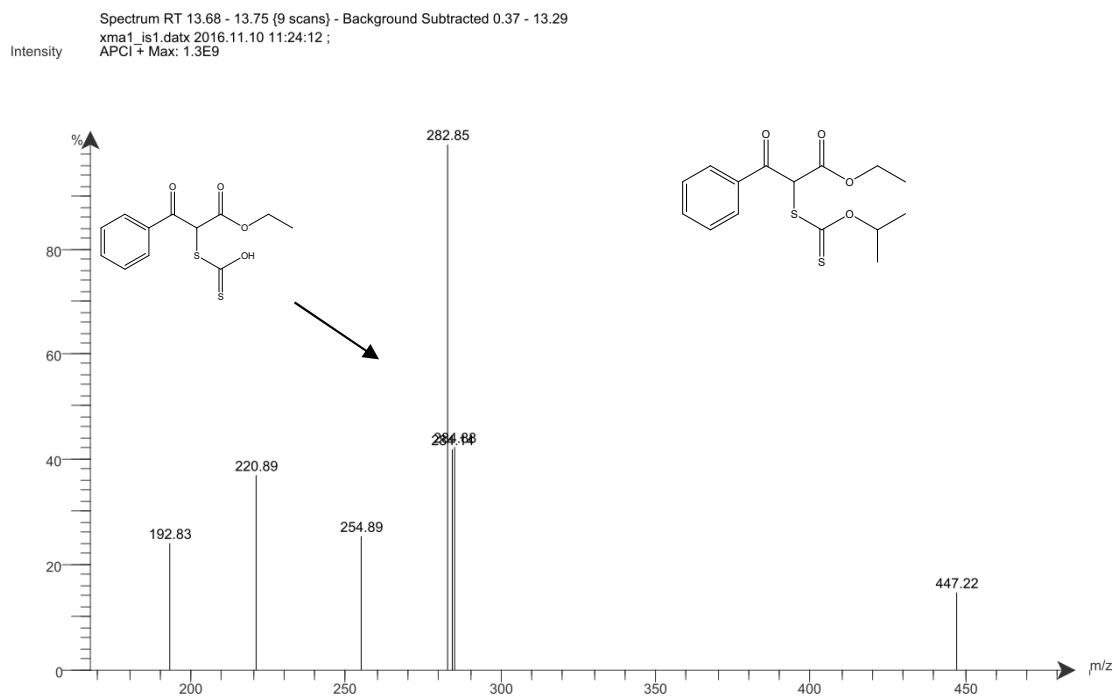

Figure S4. APCI mass spectrum of **2** in methanol.

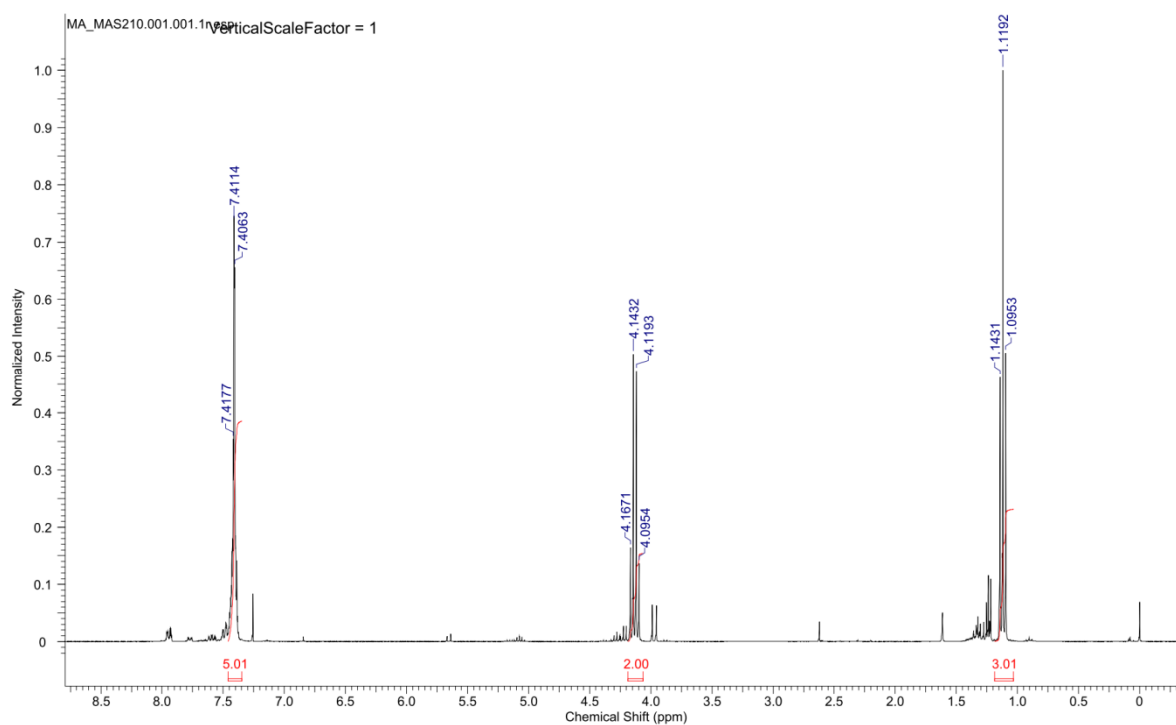

Figure S5.  $^1\text{H}$  NMR of **3** (*ecpdt*) in  $\text{CDCl}_3$  at 25 °C.

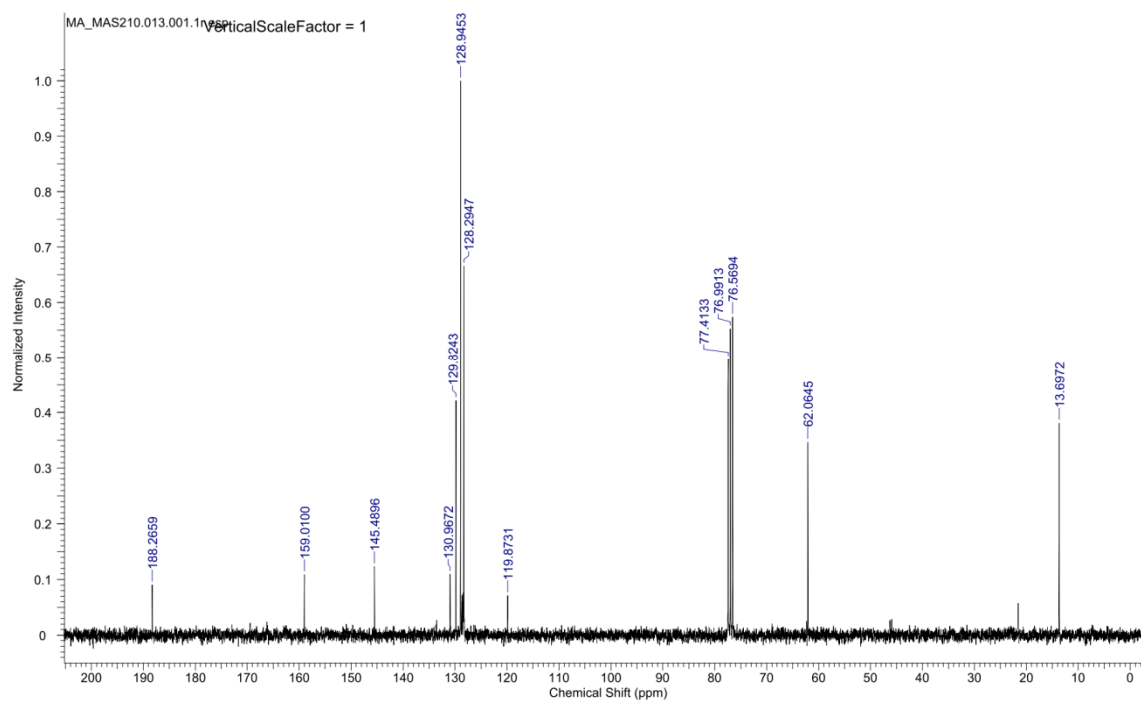

Figure S6.  $^{13}\text{C}$  NMR of **3** in  $\text{CDCl}_3$  at 25 °C.

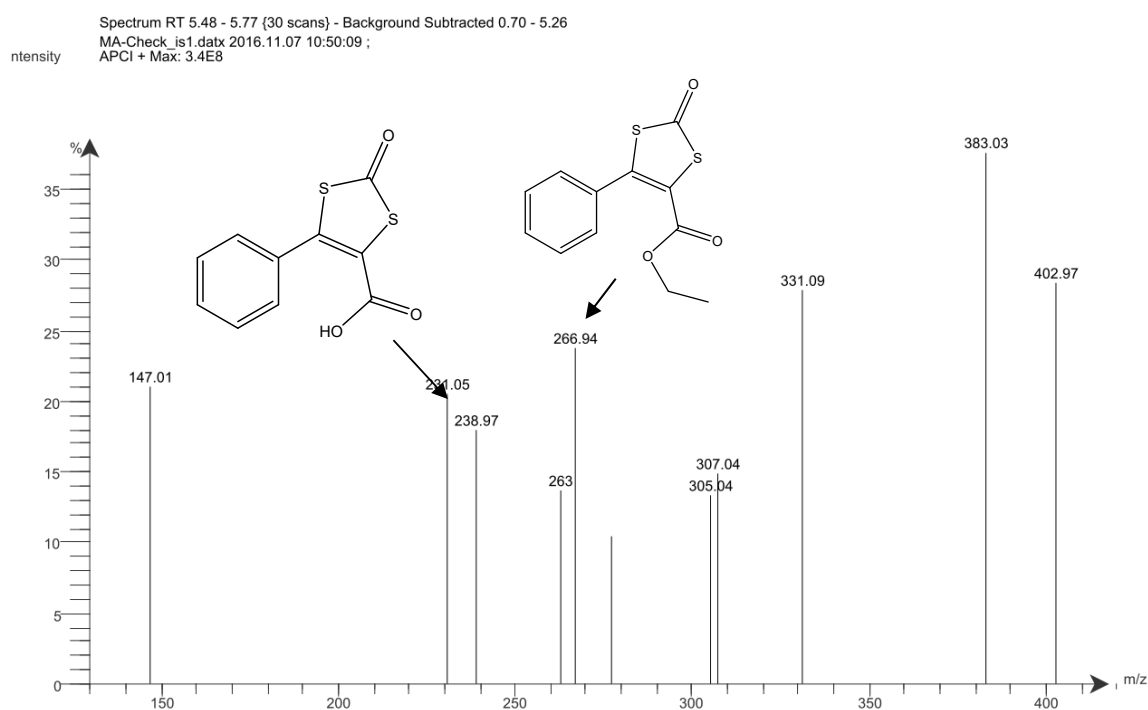

Figure S7. APCI mass spectrum of **3** in MeOH at 25 °C.

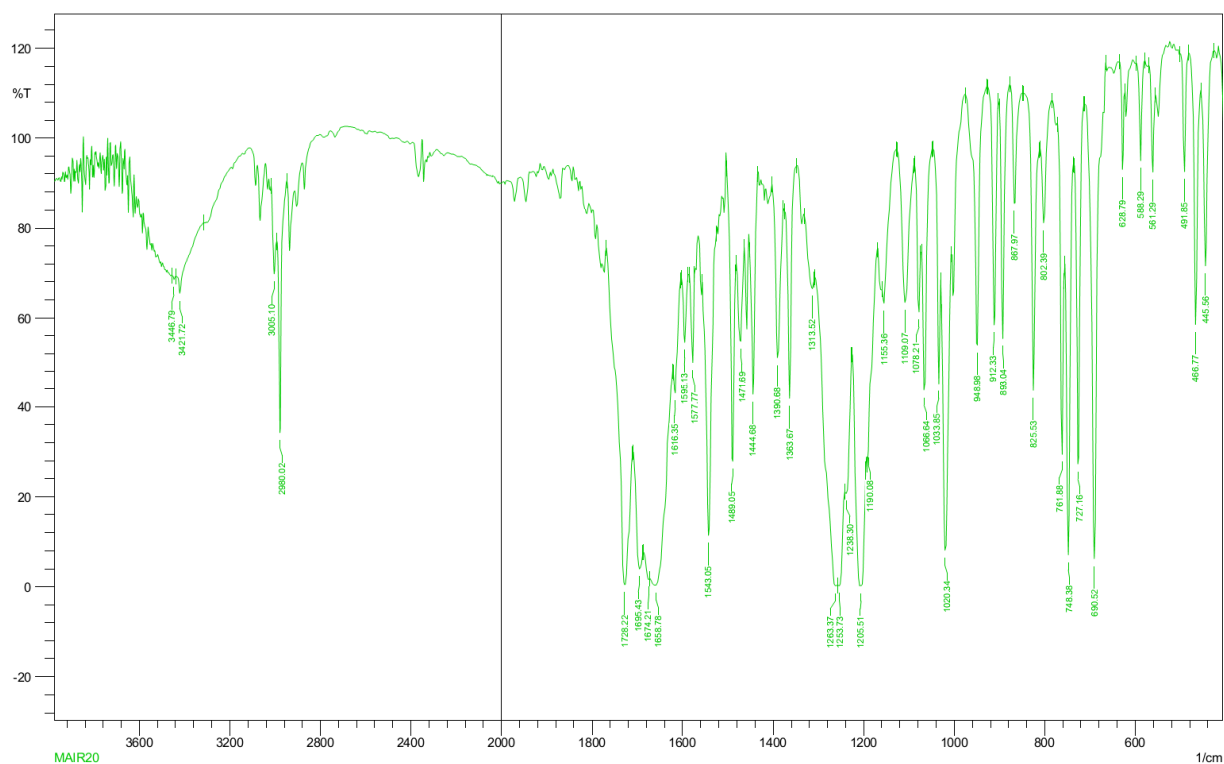

Figure S8. FT-IR spectrum of 3 in KBr plate.

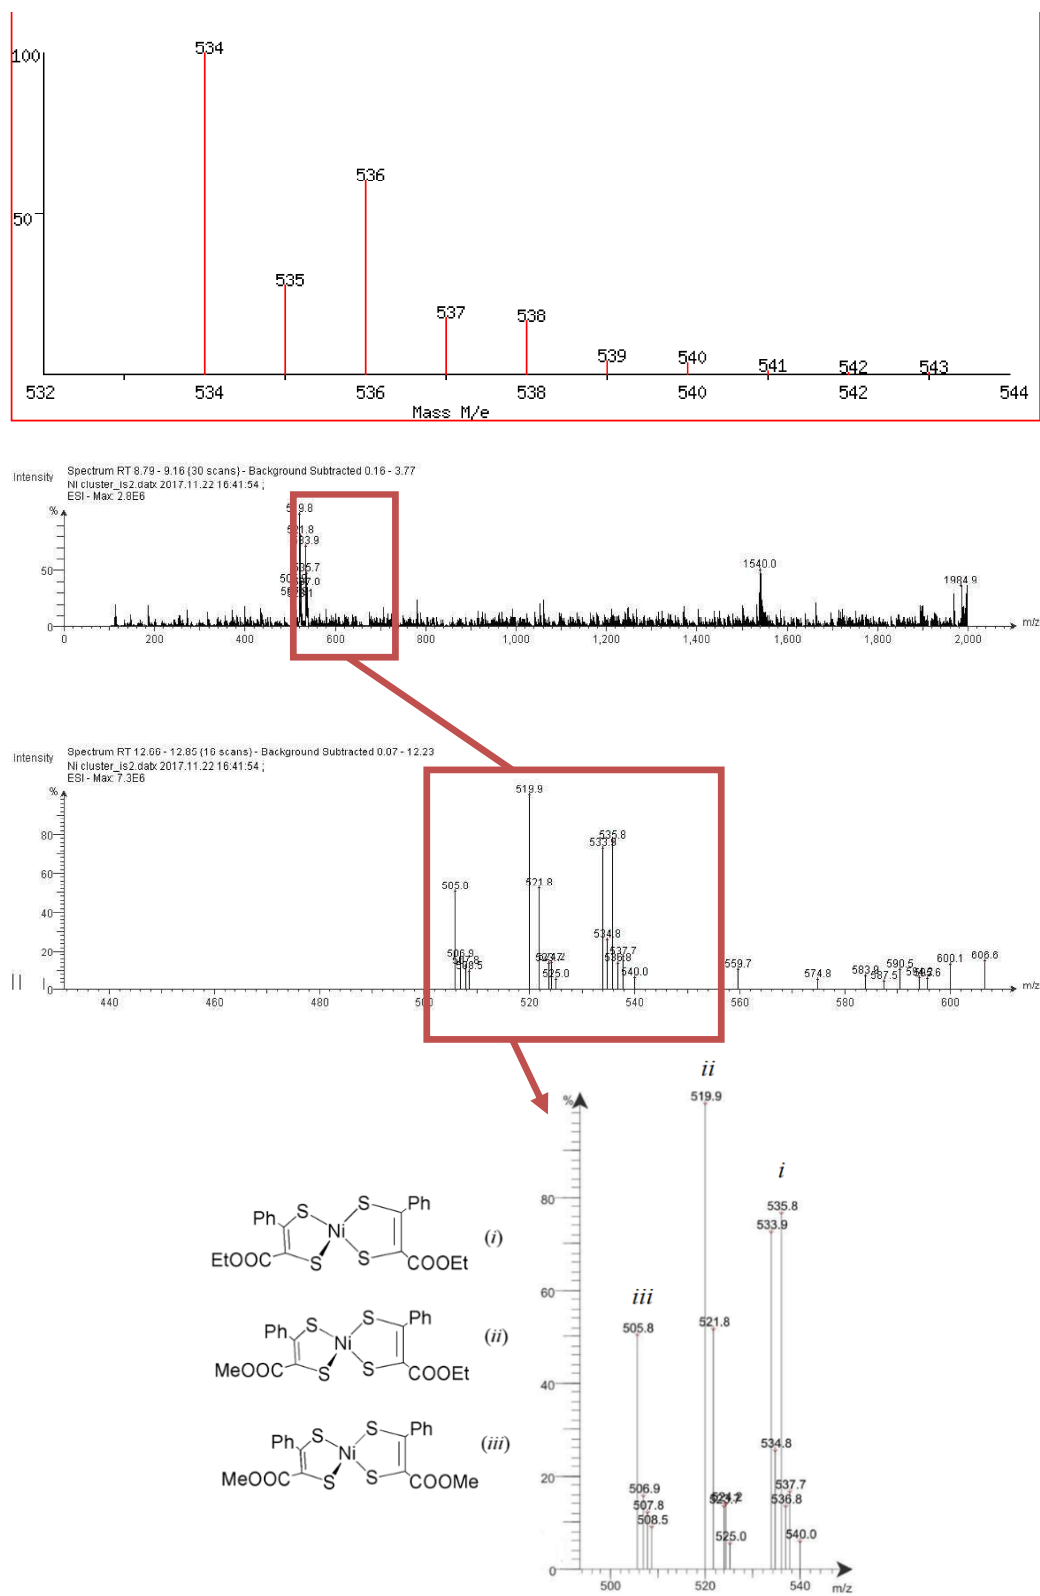

Figure S9. The ESI(-)-MS of **4** in methanol in the negative ion mode.

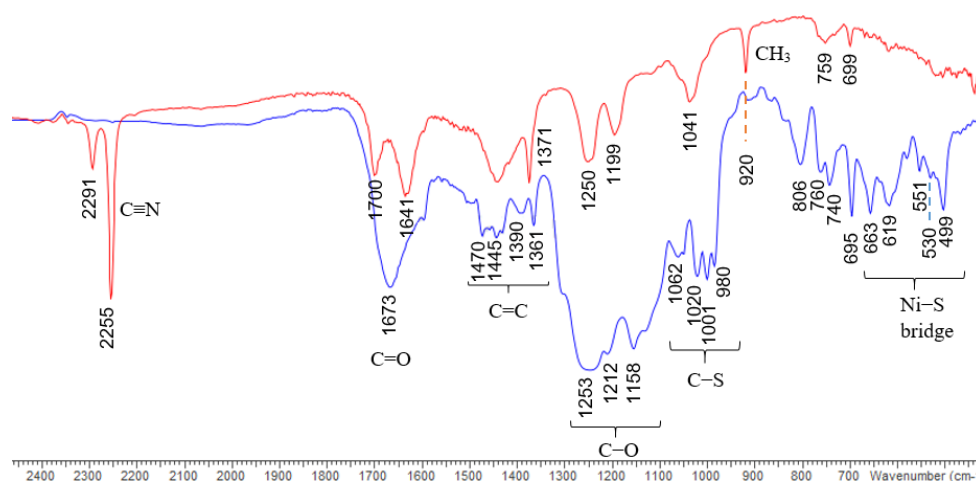

**Figure S10.** IR spectra of **4** in acetonitrile (red spectrum, top) and in solid-state (blue spectrum, bottom) (KBr pellet).

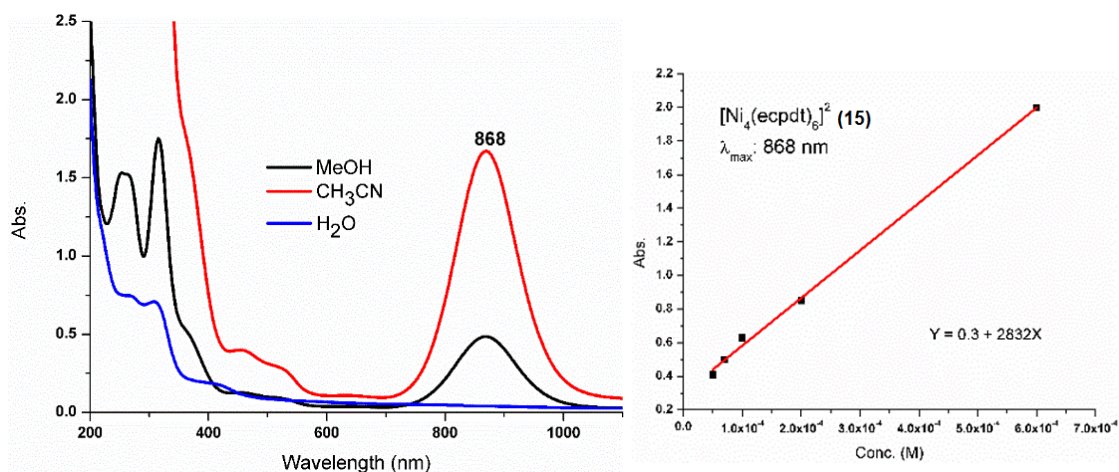

**Figure S11.** Left: UV-vis-NIR spectra of a light brown solution of **4** in acetonitrile, methanol, and water ( $5.16 \times 10^{-4}$  M each); Right: Extinction coefficient diagram at 868 nm in acetonitrile.

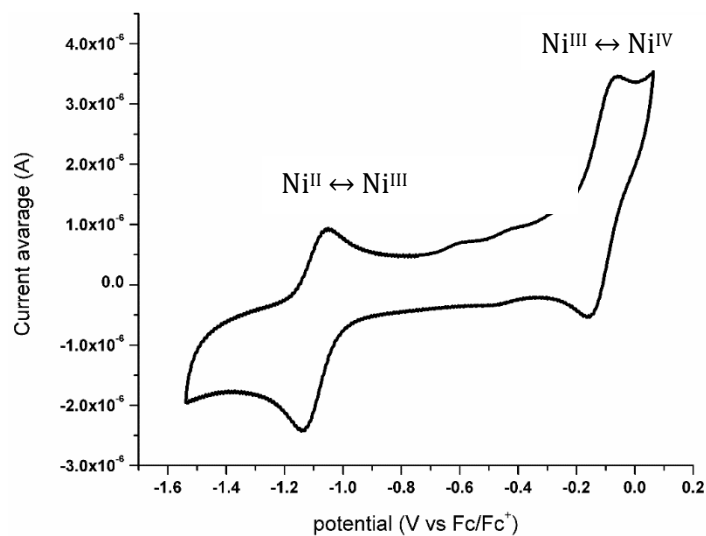

**Figure S12.** Cyclic voltammogram of **4** (1 mM) in acetonitrile containing 0.1 M of  $\text{Bu}_4\text{NPF}_6$  as electrolyte (scan rate:  $0.1 \text{ V s}^{-1}$ ). The peak potentials were recorded vs. internal reference  $[\text{Fc}]/[\text{Fc}]^+$  at 298 K.

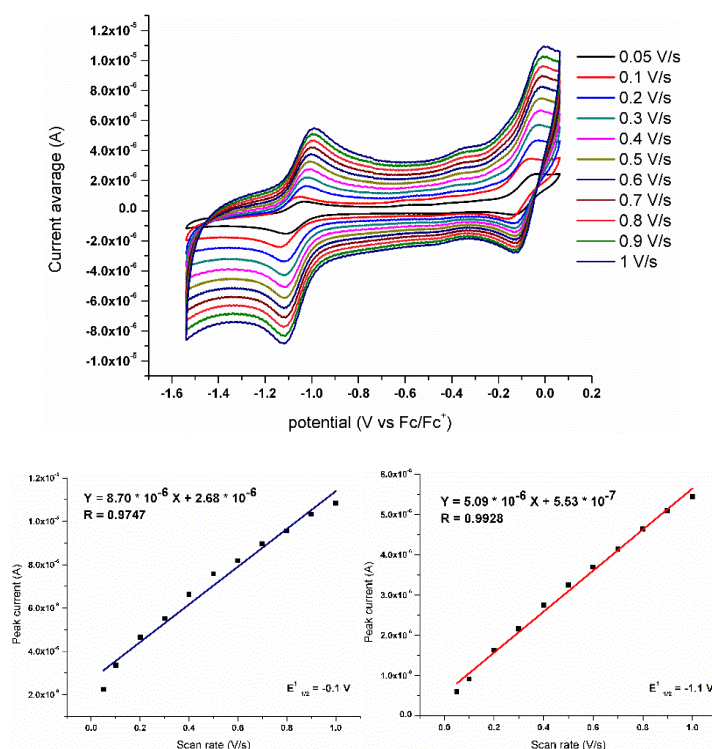

**Figure S13.** Cyclic voltammogram of **4** (1 mM) in acetonitrile containing 0.1 M of Bu<sub>4</sub>NPF<sub>6</sub> as electrolyte at different scan rates. The peak potentials were recorded vs. internal reference Fc/Fc<sup>+</sup> at 298 K (left); anodic peak current vs. scan rate plots for **4** with the linear fit (right).

## Magnetic Properties:

### 1) MSB method:

The magnetic susceptibility is calculated using the following questions:

$$\chi_{mol} = \frac{M \times C \times l \times (R - R_0)}{m \times 10^9} = 69.21 \times 10^{-4} \text{ mol}^{-1}$$

$$\chi^P = \chi_{mol} - \chi^D$$

$$\chi^D = 12 \text{ (S)} + 6 \text{ (C=C)} + 6 \text{ (Ph)} + 18 \text{ (C=C ring)} + 36 \text{ C (Ph)} + 6 \text{ (COOR)} + 12 \text{ (O)} + 12 \text{ C (C=C)} + 6 \text{ C (COOR)} + 6 \text{ (C=C-Ar)} + 6 \text{ (C=O)} + 2 \text{ (K}^+) + 2 \text{ (CH}_3\text{CN)} + 2 \text{ (Et}_2\text{O)} = -843.92 \times 10^{-6} \text{ emu mol}^{-1}$$

$$\chi^P = [6921 - (-843.92)] \times 10^{-6} = 7764.92 \times 10^{-6} \text{ emu mol}^{-1}$$

$$\mu_{eff} = \frac{3 \times k \times T \times \chi^P}{N_L \times \mu_B^2} = 9.64865698 \times 10^{-23} / 5.17977615 \times 10^{-23} = 1.86 \text{ BM}$$

$\chi_{mol}$  = molar susceptibility

$\mu_{eff}$  = magnetic moment

C = calibration constant  $1.0304 \text{ g}^{-1} \text{ cm}^{-1}$

M = molecular weight

l = length of sample in tube (cm) = 1.4

T = temperature [K]

$R_0$  = display of balance with empty tube = -41

R = display of balance with sample filled tube = +86



$k$  = Boltzmann constant  $1.380662 \times 10^{-23}$

$N_L = 6.0225 \times 10^{23} \text{ mol}^{-1}$

$\mu_B$  = Bohr magneton  $9.274 \times 10^{-24} \text{ JT}^{-1}$  (T = Tesla)

## 2) Evans' method:

The magnetic moment was determined with an NMR experiment in  $\text{CD}_3\text{CN}$  at 300 K with a Bruker Avance II-300 MHz spectrometer and a 5 mm *Wilmad* Coaxial insert NMR tube. The magnetic moment ( $\mu_{eff}$ ) was calculated using the following equation:

$$\mu_{eff} = \frac{A}{\sqrt{c/T \times \Delta ppm}} = \frac{0.0381}{\sqrt{3.55 \cdot 10^{-3} \text{ mol/L} / 300 \text{ K} \times 0.0651 \text{ ppm}}} = 2.826 \text{ BM}$$

$c$  = concentration of **4** in mol/L ( $3.55 \cdot 10^{-3} \text{ mol/L}$ )

T = Temperature [K]

$\Delta_{ppm}$  = difference of chemical shift by paramagnetic substances (Figure S14-15)

$A = 0.0381$ ; constant determined by calibration with a paramagnetic substances with known  $\mu_{eff}$  ( $\text{Cu}(\text{NO}_3)_2$ ).

In this method, the NMR tube was filled with 0.5 mL of  $3.55 \times 10^{-3} \text{ M}$  solution of **4** using a mixture of  $\text{CD}_3\text{CN}$  (475  $\mu\text{L}$ ) and *tert*-Butanol (25  $\mu\text{L}$ ) as the solvent. The capillary tube was filled with 0.5 mL of the same solvent mixture. Then, the capillary was placed into the NMR tube and the spectrum measured at 300 K. The difference of the chemical shift of the methyl protons of *t*-BuOH due to the presence of a paramagnetic substance was found to be 0.0651 (Figure S14). For calibration, we used the same method employing  $14.07 \times 10^{-3} \text{ M}$  of  $\text{Cu}(\text{NO}_3)_2$  as a known paramagnetic compound. The difference in the chemical shift of the methyl protons of *t*-BuOH was found to be 0.1216 (Figure S15). Value  $A$  in the above equation was calculated to be 0.0381 with the known  $\mu_{eff}$  value of the paramagnetic substance (1.94 BM) ( $S = \frac{1}{2}$ ). [E. A. Boudreaux and D. J. Miller, *Inorganic and Nuclear Chemistry Letters*, 1966, **2**, 59–61.]

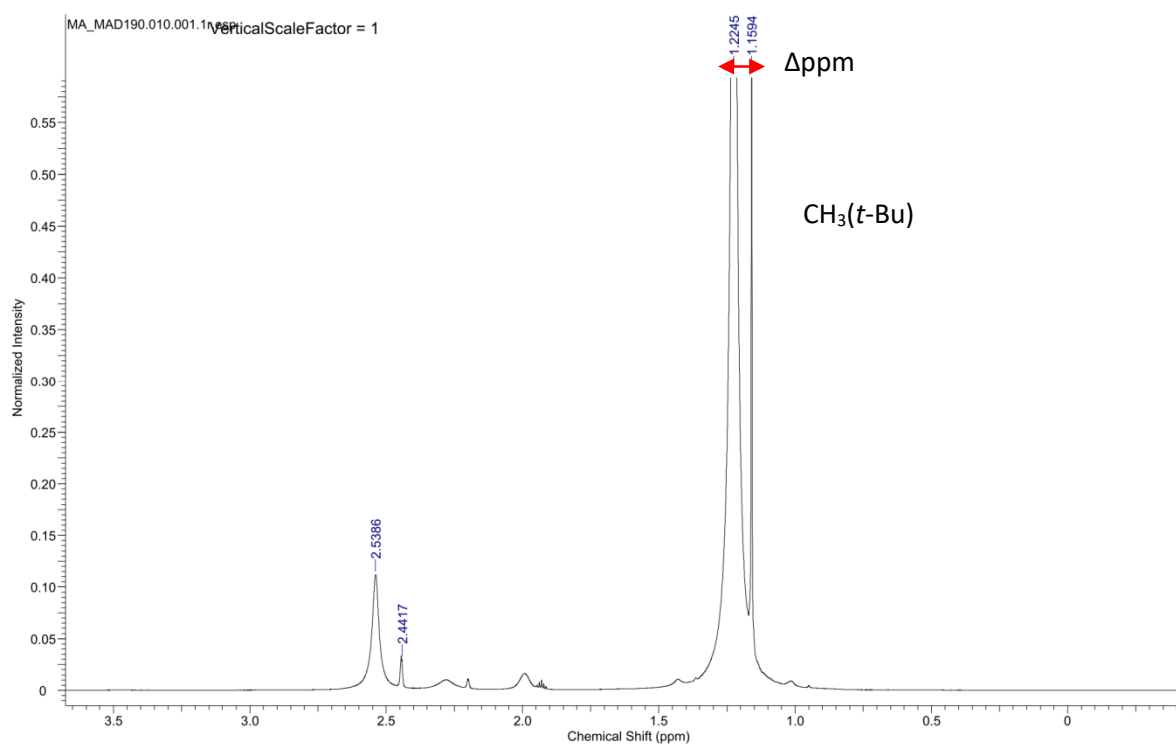

**Figure S14.**  $^1\text{H}$  NMR for measuring the magnetic moment of the Ni cluster in  $\text{CD}_3\text{CN}$  at  $25^\circ\text{C}$  ( $475\ \mu\text{L}\ \text{CD}_3\text{CN} + 22\ \mu\text{L}\ t\text{-BuOH}$ ).

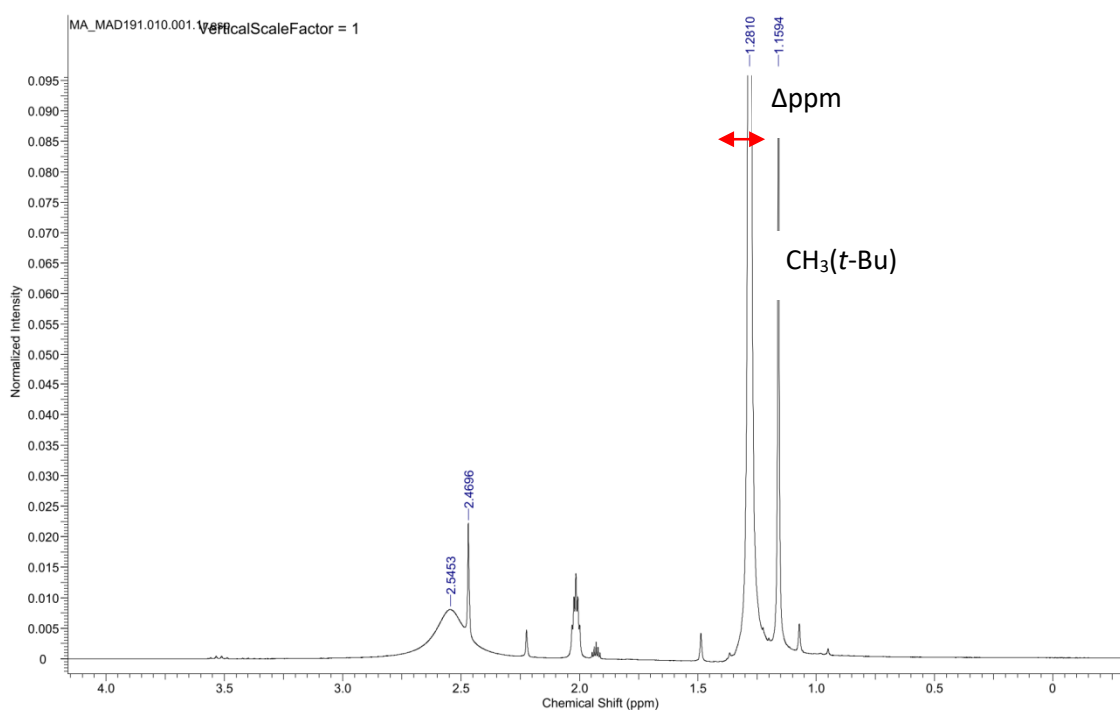

**Figure S15.**  $^1\text{H}$  NMR for measuring the magnetic moment of the  $\text{Cu}(\text{NO}_3)_2$  in  $\text{CD}_3\text{CN}$  at  $25^\circ\text{C}$  ( $475\ \mu\text{L}\ \text{CD}_3\text{CN} + 22\ \mu\text{L}\ t\text{-BuOH}$ ).

## Crystallography:

Table S1. General crystallographic data of **3** and **4·2CH<sub>3</sub>CN·2Et<sub>2</sub>O** at 170 K.

|                                                     | <b>3</b>                                                      | <b>4·2CH<sub>3</sub>CN·2Et<sub>2</sub>O</b>                                                                   |
|-----------------------------------------------------|---------------------------------------------------------------|---------------------------------------------------------------------------------------------------------------|
| CCDC number                                         | 1985587                                                       | 1985588                                                                                                       |
| Formula                                             | C <sub>12</sub> H <sub>10</sub> O <sub>3</sub> S <sub>2</sub> | C <sub>68</sub> H <sub>60</sub> K <sub>2</sub> N <sub>2</sub> Ni <sub>4</sub> O <sub>14</sub> S <sub>14</sub> |
| Mw                                                  | 266.32                                                        | 1889.09                                                                                                       |
| Crystal system                                      | Monoclinic                                                    | Monoclinic                                                                                                    |
| Space group                                         | C2/c                                                          | P2 <sub>1</sub> /n                                                                                            |
| a [Å]                                               | 30.240(6)                                                     | 13.588(3)                                                                                                     |
| b [Å]                                               | 3.9413(8)                                                     | 19.062(4)                                                                                                     |
| c [Å]                                               | 20.418(4)                                                     | 16.764(3)                                                                                                     |
| β [°]                                               | 107.77(3)                                                     | 100.11(3)                                                                                                     |
| Z                                                   | 8                                                             | 2                                                                                                             |
| V [Å <sup>3</sup> ]                                 | 2317.5(9)                                                     | 4274.8(15)                                                                                                    |
| d <sub>calc</sub> [g/cm <sup>3</sup> ]              | 1.527                                                         | 1.469                                                                                                         |
| μ [mm <sup>-1</sup> ]                               | 0.451                                                         | 1.316                                                                                                         |
| F(000)                                              | 1104                                                          | 1948                                                                                                          |
| Theta range for data collection [°]                 | 3.994 to 25.678                                               | 1.632 to 25.684                                                                                               |
| reflns collected / unique reflns / R <sub>int</sub> | 7984 / 2175 /                                                 | 32961 / 8052 / 0.0937                                                                                         |
| Data / restraints / parameters                      | 2175 / 0 / 155                                                | 8052 / 245 / 538                                                                                              |
| R <sub>1</sub> / wR <sub>2</sub> (I>2σ(I))          | 0.0501 / 0.1103                                               | 0.0568 / 0.1466                                                                                               |
| R <sub>1</sub> / wR <sub>2</sub> (all data)         | 0.0944 / 0.1292                                               | 0.1006 / 0.1668                                                                                               |
| GOF [F <sup>2</sup> ]                               | 0.940                                                         | 0.921                                                                                                         |
| residual density [e·Å <sup>-3</sup> ]               | 0.281 / -0.378                                                | 1.672 / -0.714                                                                                                |

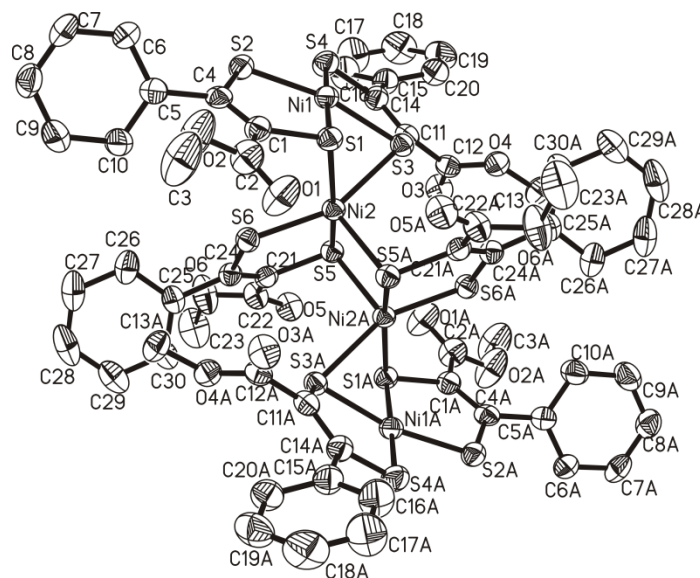

**Table S2.** Complete list of bond lengths [Å] and angles [°] for **4·2CH<sub>3</sub>CN·2Et<sub>2</sub>O**.

|                      |             |           |            |
|----------------------|-------------|-----------|------------|
| K1—O1 <sup>i</sup>   | 2.591 (5)   | C15—C16   | 1.382 (10) |
| K1—O3                | 2.651 (5)   | C15—C20   | 1.403 (9)  |
| K1—O5                | 2.676 (5)   | C16—C17   | 1.391 (10) |
| K1—O7                | 2.744 (8)   | C16—H16   | 0.9500     |
| K1—N1                | 2.831 (8)   | C17—C18   | 1.339 (12) |
| K1—S5                | 3.378 (2)   | C17—H17   | 0.9500     |
| K1—C22               | 3.511 (6)   | C18—C19   | 1.389 (11) |
| K1—C35'              | 3.53 (3)    | C18—H18   | 0.9500     |
| Ni1—S4               | 2.1464 (18) | C19—C20   | 1.412 (9)  |
| Ni1—S2               | 2.1482 (17) | C19—H19   | 0.9500     |
| Ni1—S1               | 2.1487 (17) | C20—H20   | 0.9500     |
| Ni1—S3               | 2.1725 (17) | C21—C24   | 1.369 (8)  |
| Ni1—Ni2              | 2.6747 (11) | C21—C22   | 1.488 (8)  |
| Ni2—S5               | 2.1758 (16) | C23—H23A  | 0.9800     |
| Ni2—S6               | 2.1793 (16) | C23—H23B  | 0.9800     |
| Ni2—S1               | 2.3125 (16) | C23—H23C  | 0.9800     |
| Ni2—S3               | 2.3509 (16) | C23'—H23D | 0.9800     |
| Ni2—S5 <sup>i</sup>  | 2.3554 (16) | C23'—H23E | 0.9800     |
| Ni2—Ni2 <sup>i</sup> | 2.9187 (16) | C23'—H23F | 0.9800     |
| S1—C1                | 1.745 (6)   | C24—C25   | 1.501 (8)  |
| S2—C4                | 1.711 (6)   | C25—C30   | 1.383 (9)  |
| S3—C11               | 1.749 (6)   | C25—C26   | 1.395 (9)  |
| S4—C14               | 1.729 (6)   | C26—C27   | 1.388 (10) |
| S5—C21               | 1.748 (6)   | C26—H26   | 0.9500     |
| S6—C24               | 1.712 (6)   | C27—C28   | 1.373 (12) |
| O1—C2                | 1.215 (8)   | C27—H27   | 0.9500     |
| O2—C2                | 1.338 (8)   | C28—C29   | 1.396 (11) |
| O2—C3                | 1.522 (13)  | C28—H28   | 0.9500     |
| O2—C3'               | 1.593 (17)  | C29—C30   | 1.357 (9)  |
| O3—C12               | 1.204 (7)   | C29—H29   | 0.9500     |
| O4—C12               | 1.337 (7)   | C30—H30   | 0.9500     |
| O4—C13               | 1.448 (7)   | C31—C32   | 1.473 (13) |
| O5—C22               | 1.211 (7)   | C32—H32A  | 0.9800     |
| O6—C22               | 1.335 (7)   | C32—H32B  | 0.9800     |
| O6—C23'              | 1.483 (11)  | C32—H32C  | 0.9800     |
| O6—C23               | 1.516 (16)  | O7—C35    | 1.420 (17) |

|                        |             |               |            |
|------------------------|-------------|---------------|------------|
| N1—C31                 | 1.219 (13)  | O7—C33'       | 1.422 (18) |
| C1—C4                  | 1.366 (8)   | O7—C33        | 1.474 (18) |
| C1—C2                  | 1.475 (9)   | O7—C35'       | 1.487 (19) |
| C3—H3A                 | 0.9800      | C33—C34       | 1.63 (2)   |
| C3—H3B                 | 0.9800      | C33—H33A      | 0.9900     |
| C3—H3C                 | 0.9800      | C33—H33B      | 0.9900     |
| C3'—H3A1               | 0.9800      | C34—H34A      | 0.9800     |
| C3'—H3A2               | 0.9800      | C34—H34B      | 0.9800     |
| C3'—H3A3               | 0.9800      | C34—H34C      | 0.9800     |
| C4—C5                  | 1.495 (8)   | C35—C36       | 1.64 (2)   |
| C5—C6                  | 1.385 (8)   | C35—H35A      | 0.9900     |
| C5—C10                 | 1.398 (9)   | C35—H35B      | 0.9900     |
| C6—C7                  | 1.388 (9)   | C36—H36A      | 0.9800     |
| C6—H6                  | 0.9500      | C36—H36B      | 0.9800     |
| C7—C8                  | 1.369 (10)  | C36—H36C      | 0.9800     |
| C7—H7                  | 0.9500      | C33'—C34'     | 1.67 (2)   |
| C8—C9                  | 1.361 (10)  | C33'—H33C     | 0.9900     |
| C8—H8                  | 0.9500      | C33'—H33D     | 0.9900     |
| C9—C10                 | 1.403 (9)   | C34'—H34D     | 0.9800     |
| C9—H9                  | 0.9500      | C34'—H34E     | 0.9800     |
| C10—H10                | 0.9500      | C34'—H34F     | 0.9800     |
| C11—C14                | 1.364 (8)   | C35'—C36'     | 1.60 (2)   |
| C11—C12                | 1.490 (8)   | C35'—H35C     | 0.9900     |
| C13—H13A               | 0.9800      | C35'—H35D     | 0.9900     |
| C13—H13B               | 0.9800      | C36'—H36D     | 0.9800     |
| C13—H13C               | 0.9800      | C36'—H36E     | 0.9800     |
| C14—C15                | 1.478 (9)   | C36'—H36F     | 0.9800     |
|                        |             |               |            |
| O1 <sup>i</sup> —K1—O3 | 82.86 (18)  | O4—C13—H13C   | 109.5      |
| O1 <sup>i</sup> —K1—O5 | 84.33 (16)  | H13A—C13—H13C | 109.5      |
| O3—K1—O5               | 135.41 (15) | H13B—C13—H13C | 109.5      |
| O1 <sup>i</sup> —K1—O7 | 108.6 (2)   | C11—C14—C15   | 123.7 (5)  |
| O3—K1—O7               | 115.7 (2)   | C11—C14—S4    | 120.8 (5)  |
| O5—K1—O7               | 108.9 (2)   | C15—C14—S4    | 115.4 (4)  |
| O1 <sup>i</sup> —K1—N1 | 155.3 (2)   | C16—C15—C20   | 118.2 (6)  |
| O3—K1—N1               | 105.8 (2)   | C16—C15—C14   | 121.1 (6)  |
| O5—K1—N1               | 73.2 (2)    | C20—C15—C14   | 120.6 (6)  |

|                          |             |                |           |
|--------------------------|-------------|----------------|-----------|
| O7—K1—N1                 | 88.7 (3)    | C15—C16—C17    | 121.5 (8) |
| O1 <sup>i</sup> —K1—S5   | 85.83 (12)  | C15—C16—H16    | 119.2     |
| O3—K1—S5                 | 79.58 (10)  | C17—C16—H16    | 119.2     |
| O5—K1—S5                 | 56.99 (10)  | C18—C17—C16    | 120.4 (8) |
| O7—K1—S5                 | 159.6 (2)   | C18—C17—H17    | 119.8     |
| N1—K1—S5                 | 73.4 (2)    | C16—C17—H17    | 119.8     |
| O1 <sup>i</sup> —K1—C22  | 95.65 (16)  | C17—C18—C19    | 120.8 (7) |
| O3—K1—C22                | 125.56 (15) | C17—C18—H18    | 119.6     |
| O5—K1—C22                | 16.48 (13)  | C19—C18—H18    | 119.6     |
| O7—K1—C22                | 116.1 (2)   | C18—C19—C20    | 119.5 (7) |
| N1—K1—C22                | 60.3 (2)    | C18—C19—H19    | 120.2     |
| S5—K1—C22                | 46.21 (10)  | C20—C19—H19    | 120.2     |
| O1 <sup>i</sup> —K1—C35' | 112.2 (5)   | C15—C20—C19    | 119.6 (7) |
| O3—K1—C35'               | 92.8 (5)    | C15—C20—H20    | 120.2     |
| O5—K1—C35'               | 131.5 (5)   | C19—C20—H20    | 120.2     |
| O7—K1—C35'               | 23.4 (5)    | C24—C21—C22    | 127.7 (5) |
| N1—K1—C35'               | 90.8 (5)    | C24—C21—S5     | 119.0 (5) |
| S5—K1—C35'               | 159.6 (5)   | C22—C21—S5     | 113.3 (4) |
| C22—K1—C35'              | 135.6 (5)   | O5—C22—O6      | 123.5 (6) |
| S4—Ni1—S2                | 90.62 (7)   | O5—C22—C21     | 124.1 (6) |
| S4—Ni1—S1                | 176.32 (7)  | O6—C22—C21     | 112.2 (5) |
| S2—Ni1—S1                | 91.82 (6)   | O5—C22—K1      | 38.8 (3)  |
| S4—Ni1—S3                | 92.50 (7)   | O6—C22—K1      | 131.2 (4) |
| S2—Ni1—S3                | 167.10 (7)  | C21—C22—K1     | 99.8 (4)  |
| S1—Ni1—S3                | 84.52 (6)   | O6—C23—H23A    | 109.5     |
| S4—Ni1—Ni2               | 120.45 (6)  | O6—C23—H23B    | 109.5     |
| S2—Ni1—Ni2               | 110.99 (6)  | H23A—C23—H23B  | 109.5     |
| S1—Ni1—Ni2               | 56.03 (4)   | O6—C23—H23C    | 109.5     |
| S3—Ni1—Ni2               | 56.90 (5)   | H23A—C23—H23C  | 109.5     |
| S5—Ni2—S6                | 90.24 (6)   | H23B—C23—H23C  | 109.5     |
| S5—Ni2—S1                | 164.00 (6)  | O6—C23'—H23D   | 109.5     |
| S6—Ni2—S1                | 92.80 (6)   | O6—C23'—H23E   | 109.5     |
| S5—Ni2—S3                | 94.06 (6)   | H23D—C23'—H23E | 109.5     |
| S6—Ni2—S3                | 156.26 (6)  | O6—C23'—H23F   | 109.5     |
| S1—Ni2—S3                | 77.09 (6)   | H23D—C23'—H23F | 109.5     |
| S5—Ni2—S5 <sup>i</sup>   | 99.91 (6)   | H23E—C23'—H23F | 109.5     |
| S6—Ni2—S5 <sup>i</sup>   | 99.79 (6)   | C21—C24—C25    | 124.6 (5) |

|                                       |             |                                       |            |
|---------------------------------------|-------------|---------------------------------------|------------|
| S1—Ni2—S5 <sup>i</sup>                | 95.06 (6)   | C21—C24—S6                            | 120.4 (5)  |
| S3—Ni2—S5 <sup>i</sup>                | 102.43 (5)  | C25—C24—S6                            | 115.0 (4)  |
| S5—Ni2—Ni1                            | 113.74 (5)  | C30—C25—C26                           | 119.0 (6)  |
| S6—Ni2—Ni1                            | 106.42 (5)  | C30—C25—C24                           | 121.8 (5)  |
| S1—Ni2—Ni1                            | 50.40 (4)   | C26—C25—C24                           | 119.1 (6)  |
| S3—Ni2—Ni1                            | 50.73 (4)   | C27—C26—C25                           | 119.6 (7)  |
| S5 <sup>i</sup> —Ni2—Ni1              | 136.58 (5)  | C27—C26—H26                           | 120.2      |
| S5—Ni2—Ni2 <sup>i</sup>               | 52.65 (4)   | C25—C26—H26                           | 120.2      |
| S6—Ni2—Ni2 <sup>i</sup>               | 98.07 (5)   | C28—C27—C26                           | 120.4 (7)  |
| S1—Ni2—Ni2 <sup>i</sup>               | 141.97 (6)  | C28—C27—H27                           | 119.8      |
| S3—Ni2—Ni2 <sup>i</sup>               | 103.09 (5)  | C26—C27—H27                           | 119.8      |
| S5 <sup>i</sup> —Ni2—Ni2 <sup>i</sup> | 47.25 (4)   | C27—C28—C29                           | 119.7 (7)  |
| Ni1—Ni2—Ni2 <sup>i</sup>              | 152.41 (4)  | C27—C28—H28                           | 120.2      |
| C1—S1—Ni1                             | 103.8 (2)   | C29—C28—H28                           | 120.2      |
| C1—S1—Ni2                             | 112.4 (2)   | C30—C29—C28                           | 119.9 (7)  |
| Ni1—S1—Ni2                            | 73.57 (6)   | C30—C29—H29                           | 120.1      |
| C4—S2—Ni1                             | 104.3 (2)   | C28—C29—H29                           | 120.1      |
| C11—S3—Ni1                            | 102.3 (2)   | C29—C30—C25                           | 121.3 (7)  |
| C11—S3—Ni2                            | 117.9 (2)   | C29—C30—H30                           | 119.3      |
| Ni1—S3—Ni2                            | 72.38 (5)   | C25—C30—H30                           | 119.3      |
| C14—S4—Ni1                            | 103.5 (2)   | N1—C31—C32                            | 175.3 (11) |
| C21—S5—Ni2                            | 104.7 (2)   | C31—C32—H32A                          | 109.5      |
| C21—S5—Ni2 <sup>i</sup>               | 107.23 (19) | C31—C32—H32B                          | 109.5      |
| Ni2—S5—Ni2 <sup>i</sup>               | 80.09 (6)   | H32A—C32—H32B                         | 109.5      |
| C21—S5—K1                             | 99.0 (2)    | C31—C32—H32C                          | 109.5      |
| Ni2—S5—K1                             | 146.21 (7)  | H32A—C32—H32C                         | 109.5      |
| Ni2 <sup>i</sup> —S5—K1               | 115.46 (6)  | H32B—C32—H32C                         | 109.5      |
| C24—S6—Ni2                            | 105.2 (2)   | C35—O7—C33                            | 102.4 (16) |
| C2—O1—K1 <sup>i</sup>                 | 168.6 (5)   | C33 <sup>i</sup> —O7—C35 <sup>i</sup> | 120.3 (18) |
| C2—O2—C3                              | 117.3 (8)   | C35—O7—K1                             | 127.9 (13) |
| C2—O2—C3 <sup>i</sup>                 | 109.9 (11)  | C33 <sup>i</sup> —O7—K1               | 123.6 (14) |
| C12—O3—K1                             | 133.7 (4)   | C33—O7—K1                             | 112.4 (11) |
| C12—O4—C13                            | 116.1 (5)   | C35 <sup>i</sup> —O7—K1               | 109.5 (15) |
| C22—O5—K1                             | 124.7 (4)   | O7—C33—C34                            | 84.9 (12)  |
| C22—O6—C23 <sup>i</sup>               | 116.5 (8)   | O7—C33—H33A                           | 114.5      |
| C22—O6—C23                            | 111.6 (13)  | C34—C33—H33A                          | 114.5      |
| C31—N1—K1                             | 134.3 (8)   | O7—C33—H33B                           | 114.5      |

|               |           |                |           |
|---------------|-----------|----------------|-----------|
| C4—C1—C2      | 127.3 (5) | C34—C33—H33B   | 114.5     |
| C4—C1—S1      | 119.3 (4) | H33A—C33—H33B  | 111.6     |
| C2—C1—S1      | 113.3 (4) | C33—C34—H34A   | 109.5     |
| O1—C2—O2      | 122.2 (6) | C33—C34—H34B   | 109.5     |
| O1—C2—C1      | 124.2 (6) | H34A—C34—H34B  | 109.5     |
| O2—C2—C1      | 113.5 (6) | C33—C34—H34C   | 109.5     |
| O2—C3—H3A     | 109.5     | H34A—C34—H34C  | 109.5     |
| O2—C3—H3B     | 109.5     | H34B—C34—H34C  | 109.5     |
| H3A—C3—H3B    | 109.5     | O7—C35—C36     | 85.0 (12) |
| O2—C3—H3C     | 109.5     | O7—C35—H35A    | 114.5     |
| H3A—C3—H3C    | 109.5     | C36—C35—H35A   | 114.5     |
| H3B—C3—H3C    | 109.5     | O7—C35—H35B    | 114.5     |
| O2—C3'—H3A1   | 109.5     | C36—C35—H35B   | 114.5     |
| O2—C3'—H3A2   | 109.5     | H35A—C35—H35B  | 111.6     |
| H3A1—C3'—H3A2 | 109.5     | C35—C36—H36A   | 109.5     |
| O2—C3'—H3A3   | 109.5     | C35—C36—H36B   | 109.5     |
| H3A1—C3'—H3A3 | 109.5     | H36A—C36—H36B  | 109.5     |
| H3A2—C3'—H3A3 | 109.5     | C35—C36—H36C   | 109.5     |
| C1—C4—C5      | 125.2 (5) | H36A—C36—H36C  | 109.5     |
| C1—C4—S2      | 120.4 (4) | H36B—C36—H36C  | 109.5     |
| C5—C4—S2      | 114.3 (4) | O7—C33'—C34'   | 83.7 (12) |
| C6—C5—C10     | 119.4 (6) | O7—C33'—H33C   | 114.7     |
| C6—C5—C4      | 121.1 (5) | C34'—C33'—H33C | 114.7     |
| C10—C5—C4     | 119.4 (5) | O7—C33'—H33D   | 114.7     |
| C5—C6—C7      | 120.1 (6) | C34'—C33'—H33D | 114.7     |
| C5—C6—H6      | 119.9     | H33C—C33'—H33D | 111.8     |
| C7—C6—H6      | 119.9     | C33'—C34'—H34D | 109.5     |
| C8—C7—C6      | 120.5 (6) | C33'—C34'—H34E | 109.5     |
| C8—C7—H7      | 119.7     | H34D—C34'—H34E | 109.5     |
| C6—C7—H7      | 119.7     | C33'—C34'—H34F | 109.5     |
| C9—C8—C7      | 120.1 (6) | H34D—C34'—H34F | 109.5     |
| C9—C8—H8      | 119.9     | H34E—C34'—H34F | 109.5     |
| C7—C8—H8      | 119.9     | O7—C35'—C36'   | 84.5 (13) |
| C8—C9—C10     | 120.8 (7) | O7—C35'—K1     | 47.1 (11) |
| C8—C9—H9      | 119.6     | C36'—C35'—K1   | 87.7 (15) |
| C10—C9—H9     | 119.6     | O7—C35'—H35C   | 114.6     |
| C5—C10—C9     | 119.0 (6) | C36'—C35'—H35C | 114.6     |



|               |           |                |       |
|---------------|-----------|----------------|-------|
| C5—C10—H10    | 120.5     | K1—C35'—H35C   | 151.5 |
| C9—C10—H10    | 120.5     | O7—C35'—H35D   | 114.6 |
| C14—C11—C12   | 122.0 (5) | C36'—C35'—H35D | 114.6 |
| C14—C11—S3    | 119.6 (5) | K1—C35'—H35D   | 70.6  |
| C12—C11—S3    | 118.2 (4) | H35C—C35'—H35D | 111.7 |
| O3—C12—O4     | 123.0 (6) | C35'—C36'—H36D | 109.5 |
| O3—C12—C11    | 124.2 (6) | C35'—C36'—H36E | 109.5 |
| O4—C12—C11    | 112.8 (5) | H36D—C36'—H36E | 109.5 |
| O4—C13—H13A   | 109.5     | C35'—C36'—H36F | 109.5 |
| O4—C13—H13B   | 109.5     | H36D—C36'—H36F | 109.5 |
| H13A—C13—H13B | 109.5     | H36E—C36'—H36F | 109.5 |

Symmetry code: (i)  $-x+1, -y+1, -z+1$ .

**Table S3.** Hydrogen-bond geometry [ $\text{\AA}$  and  $^\circ$ ] of **4·2CH<sub>3</sub>CN·2Et<sub>2</sub>O**.

| Donor—H...Acceptor             | [ARU]  | D - H | H...A | D...A     | D - H...A |
|--------------------------------|--------|-------|-------|-----------|-----------|
| C8—H8...O4                     | [2545] | 0.95  | 2.55  | 3.420(8)  | 152       |
| C32—H32A...N1                  | [3766] | 0.98  | 2.45  | 3.276(13) | 142       |
| C32—H32B...S2 <sub>intra</sub> | [3666] | 0.98  | 2.82  | 3.727(9)  | 153       |

Translation of ARU-Code to CIF and Equivalent Position Code

|          |                        |
|----------|------------------------|
| [3666] = | $1-x, 1-y, 1-z$        |
| [3766] = | $2-x, 1-y, 1-z$        |
| [2545] = | $1/2-x, -1/2+y, 1/2-z$ |

**Table S4.** Atomic coordinates ( $\times 10^4$ ) and equivalent isotropic displacement parameters ( $\text{\AA}^2 \times 10^3$ ) for **4·2CH<sub>3</sub>CN·2Et<sub>2</sub>O**.  $U(\text{eq})$  is defined as one third of the trace of the orthogonalized  $U_{ij}$  tensor.

|     | <i>x</i>     | <i>y</i>    | <i>z</i>     | $U_{\text{eq}}$ |
|-----|--------------|-------------|--------------|-----------------|
| K1  | 0.71016 (11) | 0.44706 (8) | 0.29867 (9)  | 47 (3)          |
| Ni1 | 0.69418 (5)  | 0.38751 (4) | 0.65910 (4)  | 34 (2)          |
| Ni2 | 0.56826 (5)  | 0.47859 (4) | 0.57311 (4)  | 30 (1)          |
| S1  | 0.57039 (11) | 0.43544 (8) | 0.70232 (8)  | 35 (1)          |
| S2  | 0.80032 (11) | 0.44076 (8) | 0.74891 (9)  | 38 (1)          |
| S3  | 0.58250 (11) | 0.35685 (7) | 0.55581 (8)  | 33 (1)          |
| S4  | 0.81342 (12) | 0.34155 (9) | 0.60819 (10) | 43 (1)          |

|      |              |             |             |         |
|------|--------------|-------------|-------------|---------|
| S5   | 0.60600 (10) | 0.50403 (7) | 0.45559 (8) | 32 (1)  |
| S6   | 0.61603 (11) | 0.58272 (7) | 0.61768 (8) | 34 (1)  |
| O1   | 0.4664 (4)   | 0.5381 (3)  | 0.7878 (3)  | 66 (2)  |
| O2   | 0.5951 (4)   | 0.5608 (4)  | 0.8873 (3)  | 79 (2)  |
| O3   | 0.6331 (3)   | 0.3283 (2)  | 0.3424 (3)  | 49 (1)  |
| O4   | 0.5258 (3)   | 0.2675 (2)  | 0.4024 (2)  | 40 (1)  |
| O5   | 0.6917 (3)   | 0.5831 (2)  | 0.3326 (3)  | 48 (1)  |
| O6   | 0.7837 (4)   | 0.6551 (3)  | 0.4222 (3)  | 61 (1)  |
| N1   | 0.8701 (6)   | 0.4804 (5)  | 0.4253 (6)  | 108 (3) |
| C1   | 0.6271 (4)   | 0.4932 (3)  | 0.7773 (3)  | 36 (1)  |
| C2   | 0.5549 (5)   | 0.5331 (4)  | 0.8156 (4)  | 52 (2)  |
| C3   | 0.5247 (12)  | 0.5983 (18) | 0.9345 (15) | 86 (4)  |
| C3'  | 0.5331 (19)  | 0.6283 (17) | 0.905 (2)   | 84 (4)  |
| C4   | 0.7290 (4)   | 0.4959 (3)  | 0.7958 (3)  | 35 (1)  |
| C5   | 0.7878 (4)   | 0.5483 (3)  | 0.8510 (3)  | 37 (1)  |
| C6   | 0.8593 (5)   | 0.5273 (4)  | 0.9158 (4)  | 45 (2)  |
| C7   | 0.9153 (5)   | 0.5770 (4)  | 0.9647 (4)  | 51 (2)  |
| C8   | 0.9032 (5)   | 0.6469 (4)  | 0.9475 (4)  | 51 (2)  |
| C9   | 0.8342 (6)   | 0.6686 (4)  | 0.8833 (4)  | 57 (2)  |
| C10  | 0.7749 (5)   | 0.6198 (3)  | 0.8337 (4)  | 50 (2)  |
| C11  | 0.6560 (4)   | 0.3273 (3)  | 0.4868 (3)  | 36 (1)  |
| C12  | 0.6051 (4)   | 0.3092 (3)  | 0.4032 (4)  | 36 (1)  |
| C13  | 0.4745 (5)   | 0.2455 (4)  | 0.3233 (4)  | 47 (2)  |
| C14  | 0.7559 (4)   | 0.3167 (3)  | 0.5121 (4)  | 39 (1)  |
| C15  | 0.8205 (5)   | 0.2792 (3)  | 0.4638 (4)  | 45 (2)  |
| C16  | 0.9166 (5)   | 0.3019 (4)  | 0.4617 (5)  | 62 (2)  |
| C17  | 0.9801 (6)   | 0.2644 (5)  | 0.4207 (6)  | 74 (2)  |
| C18  | 0.9480 (6)   | 0.2060 (5)  | 0.3799 (6)  | 73 (2)  |
| C19  | 0.8520 (6)   | 0.1808 (4)  | 0.3794 (5)  | 64 (2)  |
| C20  | 0.7874 (5)   | 0.2173 (4)  | 0.4223 (4)  | 49 (2)  |
| C21  | 0.6617 (4)   | 0.5868 (3)  | 0.4686 (3)  | 34 (1)  |
| C22  | 0.7108 (5)   | 0.6083 (3)  | 0.3999 (4)  | 41 (1)  |
| C23  | 0.809 (3)    | 0.6942 (18) | 0.3498 (14) | 67 (4)  |
| C23' | 0.8457 (18)  | 0.6734 (13) | 0.3607 (11) | 63 (3)  |
| C24  | 0.6610 (4)   | 0.6221 (3)  | 0.5396 (3)  | 32 (1)  |
| C25  | 0.6978 (4)   | 0.6959 (3)  | 0.5561 (4)  | 38 (1)  |
| C26  | 0.7638 (5)   | 0.7103 (4)  | 0.6278 (4)  | 48 (2)  |

|      |             |             |             |         |
|------|-------------|-------------|-------------|---------|
| C27  | 0.7959 (5)  | 0.7786 (4)  | 0.6450 (5)  | 59 (2)  |
| C28  | 0.7642 (6)  | 0.8317 (4)  | 0.5913 (6)  | 66 (2)  |
| C29  | 0.6960 (6)  | 0.8173 (4)  | 0.5208 (5)  | 61 (2)  |
| C30  | 0.6633 (5)  | 0.7507 (3)  | 0.5047 (4)  | 48 (2)  |
| C31  | 0.8755 (7)  | 0.5017 (6)  | 0.4945 (6)  | 86 (2)  |
| C32  | 0.8899 (6)  | 0.5303 (5)  | 0.5774 (5)  | 68 (2)  |
| O7   | 0.8460 (7)  | 0.4334 (5)  | 0.1964 (5)  | 122 (3) |
| C33  | 0.8310 (19) | 0.4859 (12) | 0.1308 (12) | 134 (4) |
| C34  | 0.887 (2)   | 0.5397 (11) | 0.1998 (16) | 149 (5) |
| C35  | 0.9519 (14) | 0.4301 (12) | 0.2171 (17) | 137 (4) |
| C36  | 0.935 (2)   | 0.3450 (12) | 0.2207 (19) | 149 (5) |
| C33' | 0.9134 (17) | 0.4874 (13) | 0.183 (2)   | 132 (4) |
| C34' | 0.809 (2)   | 0.5308 (14) | 0.146 (2)   | 138 (5) |
| C35' | 0.875 (2)   | 0.3585 (12) | 0.192 (2)   | 138 (4) |
| C36' | 0.964 (2)   | 0.3788 (18) | 0.2649 (19) | 143 (5) |

**Table S5.** Anisotropic displacement parameters ( $\text{\AA}^2 \times 10^3$ ) for **4·2CH<sub>3</sub>CN·2EtO**. The anisotropic displacement factor exponent takes the form:  $-2 \pi^2 [h^2 a^{*2} U_{11} + \dots + 2 h k a^* b^* U_{12}]$ .

|     | $U^{11}$   | $U^{22}$   | $U^{33}$   | $U^{12}$    | $U^{13}$    | $U^{23}$    |
|-----|------------|------------|------------|-------------|-------------|-------------|
| K1  | 0.0463 (8) | 0.0514 (9) | 0.0440 (8) | −0.0016 (6) | 0.0112 (6)  | −0.0034 (6) |
| Ni1 | 0.0374 (4) | 0.0315 (4) | 0.0321 (4) | 0.0034 (3)  | 0.0024 (3)  | −0.0004 (3) |
| Ni2 | 0.0333 (4) | 0.0296 (4) | 0.0264 (4) | 0.0016 (3)  | 0.0039 (3)  | 0.0007 (3)  |
| S1  | 0.0384 (8) | 0.0354 (8) | 0.0292 (7) | 0.0008 (6)  | 0.0038 (6)  | 0.0019 (6)  |
| S2  | 0.0381 (8) | 0.0381 (8) | 0.0365 (8) | 0.0019 (6)  | 0.0008 (6)  | −0.0026 (6) |
| S3  | 0.0360 (8) | 0.0291 (7) | 0.0325 (7) | 0.0012 (6)  | 0.0051 (6)  | −0.0010 (6) |
| S4  | 0.0370 (8) | 0.0446 (9) | 0.0467 (9) | 0.0075 (7)  | 0.0030 (7)  | −0.0059 (7) |
| S5  | 0.0338 (7) | 0.0316 (7) | 0.0300 (7) | 0.0011 (5)  | 0.0060 (5)  | 0.0003 (6)  |
| S6  | 0.0385 (8) | 0.0328 (8) | 0.0295 (7) | −0.0007 (6) | 0.0048 (6)  | −0.0020 (6) |
| O1  | 0.047 (3)  | 0.095 (4)  | 0.054 (3)  | 0.013 (3)   | 0.003 (2)   | −0.026 (3)  |
| O2  | 0.055 (3)  | 0.122 (5)  | 0.060 (3)  | 0.004 (3)   | 0.009 (2)   | −0.050 (3)  |
| O3  | 0.060 (3)  | 0.052 (3)  | 0.038 (2)  | −0.005 (2)  | 0.017 (2)   | −0.002 (2)  |
| O4  | 0.039 (2)  | 0.041 (2)  | 0.038 (2)  | 0.0007 (18) | 0.0064 (17) | 0.0002 (18) |
| O5  | 0.060 (3)  | 0.050 (3)  | 0.036 (2)  | −0.005 (2)  | 0.017 (2)   | 0.000 (2)   |
| O6  | 0.072 (3)  | 0.057 (3)  | 0.064 (3)  | −0.027 (2)  | 0.042 (3)   | −0.018 (2)  |
| N1  | 0.093 (5)  | 0.108 (6)  | 0.102 (5)  | 0.012 (5)   | −0.039 (5)  | −0.017 (5)  |
| C1  | 0.041 (3)  | 0.036 (3)  | 0.029 (3)  | 0.002 (2)   | 0.004 (2)   | −0.001 (2)  |

|      |           |           |           |            |            |            |
|------|-----------|-----------|-----------|------------|------------|------------|
| C2   | 0.057 (5) | 0.061 (5) | 0.040 (4) | 0.003 (3)  | 0.011 (3)  | −0.009 (3) |
| C3   | 0.068 (6) | 0.131 (9) | 0.060 (7) | 0.002 (7)  | 0.014 (5)  | −0.052 (6) |
| C3'  | 0.060 (7) | 0.140 (9) | 0.056 (8) | −0.005 (7) | 0.023 (6)  | −0.054 (7) |
| C4   | 0.049 (4) | 0.033 (3) | 0.022 (3) | 0.005 (2)  | 0.003 (2)  | 0.004 (2)  |
| C5   | 0.041 (3) | 0.038 (3) | 0.034 (3) | 0.005 (3)  | 0.008 (2)  | 0.000 (3)  |
| C6   | 0.046 (4) | 0.045 (4) | 0.040 (3) | 0.000 (3)  | −0.006 (3) | 0.001 (3)  |
| C7   | 0.039 (4) | 0.067 (5) | 0.041 (4) | 0.001 (3)  | −0.005 (3) | −0.010 (3) |
| C8   | 0.049 (4) | 0.052 (4) | 0.049 (4) | 0.000 (3)  | 0.000 (3)  | −0.018 (3) |
| C9   | 0.071 (5) | 0.037 (4) | 0.060 (5) | −0.002 (3) | 0.005 (4)  | −0.007 (3) |
| C10  | 0.068 (4) | 0.038 (4) | 0.041 (4) | 0.005 (3)  | −0.004 (3) | −0.004 (3) |
| C11  | 0.043 (3) | 0.029 (3) | 0.037 (3) | 0.002 (2)  | 0.008 (3)  | 0.000 (2)  |
| C12  | 0.039 (3) | 0.031 (3) | 0.039 (3) | 0.006 (2)  | 0.010 (3)  | −0.001 (2) |
| C13  | 0.044 (4) | 0.056 (4) | 0.036 (3) | −0.003 (3) | −0.002 (3) | −0.007 (3) |
| C14  | 0.037 (3) | 0.038 (3) | 0.040 (3) | 0.002 (3)  | 0.004 (3)  | −0.003 (3) |
| C15  | 0.039 (4) | 0.047 (4) | 0.051 (4) | 0.004 (3)  | 0.010 (3)  | −0.004 (3) |
| C16  | 0.049 (4) | 0.066 (5) | 0.077 (5) | 0.002 (4)  | 0.022 (4)  | −0.013 (4) |
| C17  | 0.059 (5) | 0.074 (6) | 0.096 (7) | 0.005 (4)  | 0.034 (4)  | −0.018 (5) |
| C18  | 0.057 (5) | 0.080 (6) | 0.092 (6) | 0.020 (4)  | 0.037 (4)  | −0.003 (5) |
| C19  | 0.075 (6) | 0.051 (5) | 0.067 (5) | 0.017 (4)  | 0.019 (4)  | −0.008 (4) |
| C20  | 0.047 (4) | 0.048 (4) | 0.052 (4) | 0.007 (3)  | 0.013 (3)  | −0.005 (3) |
| C21  | 0.030 (3) | 0.037 (3) | 0.033 (3) | 0.000 (2)  | 0.002 (2)  | 0.004 (2)  |
| C22  | 0.047 (4) | 0.038 (3) | 0.040 (4) | −0.004 (3) | 0.017 (3)  | −0.001 (3) |
| C23  | 0.071 (8) | 0.076 (8) | 0.069 (6) | −0.014 (7) | 0.056 (7)  | −0.019 (6) |
| C23' | 0.069 (7) | 0.063 (7) | 0.071 (6) | −0.014 (6) | 0.052 (5)  | −0.012 (5) |
| C24  | 0.035 (3) | 0.033 (3) | 0.028 (3) | 0.001 (2)  | 0.005 (2)  | −0.002 (2) |
| C25  | 0.039 (3) | 0.033 (3) | 0.043 (3) | −0.005 (2) | 0.013 (3)  | −0.007 (3) |
| C26  | 0.038 (4) | 0.056 (4) | 0.050 (4) | −0.009 (3) | 0.012 (3)  | −0.017 (3) |
| C27  | 0.047 (4) | 0.062 (5) | 0.070 (5) | −0.019 (4) | 0.021 (4)  | −0.031 (4) |
| C28  | 0.062 (5) | 0.042 (4) | 0.105 (7) | −0.018 (4) | 0.041 (5)  | −0.027 (4) |
| C29  | 0.073 (5) | 0.037 (4) | 0.076 (5) | −0.004 (3) | 0.024 (4)  | 0.001 (4)  |
| C30  | 0.055 (4) | 0.034 (4) | 0.056 (4) | −0.006 (3) | 0.015 (3)  | −0.002 (3) |
| C31  | 0.064 (5) | 0.096 (6) | 0.091 (5) | 0.007 (4)  | −0.003 (5) | −0.003 (5) |
| C32  | 0.054 (4) | 0.082 (6) | 0.067 (4) | 0.011 (4)  | 0.011 (4)  | 0.008 (4)  |
| O7   | 0.122 (5) | 0.134 (6) | 0.128 (6) | −0.010 (5) | 0.070 (5)  | −0.021 (5) |
| C33  | 0.136 (7) | 0.141 (8) | 0.139 (8) | −0.008 (7) | 0.064 (7)  | −0.019 (6) |

|      |            |            |            |            |            |             |
|------|------------|------------|------------|------------|------------|-------------|
| C34  | 0.151 (10) | 0.150 (9)  | 0.160 (10) | −0.015 (9) | 0.062 (9)  | −0.025 (9)  |
| C35  | 0.132 (7)  | 0.151 (8)  | 0.140 (7)  | −0.007 (7) | 0.057 (7)  | −0.017 (7)  |
| C36  | 0.136 (11) | 0.160 (9)  | 0.152 (11) | 0.008 (9)  | 0.028 (10) | −0.019 (10) |
| C33' | 0.132 (7)  | 0.140 (8)  | 0.141 (8)  | −0.007 (6) | 0.066 (7)  | −0.021 (7)  |
| C34' | 0.142 (10) | 0.144 (10) | 0.141 (11) | 0.000 (9)  | 0.066 (10) | −0.013 (10) |
| C35' | 0.137 (7)  | 0.146 (8)  | 0.143 (8)  | 0.000 (7)  | 0.058 (7)  | −0.022 (7)  |
| C36' | 0.141 (10) | 0.143 (11) | 0.153 (11) | 0.000 (9)  | 0.049 (8)  | −0.027 (9)  |
